# Supplementary material
Source: PubMed Central journal article supplement (PMC2915689)
Supplement: supp_M110.127779_jbc.M110.127779-1.pdf [file supp_M110.127779_jbc.M110.127779-1.pdf]

## SUPPLEMENTARY DATA

**Table S1**

Purification of mutant AKR1D1 from *E.coli*.

| <b>Enzyme</b> | <b>Final protein<br/>(mg)</b> | <b>Specific activity<br/>(nmol min<sup>-1</sup> mg<sup>-1</sup>)</b> | <b>Yield<br/>(%)</b> |
|---------------|-------------------------------|----------------------------------------------------------------------|----------------------|
| AKR1D1        | 5.7                           | 81                                                                   | 56                   |
| AKR1D1-L106F* | 3.3                           | 0.05                                                                 | 7                    |
| AKR1D1-P133R  | 1.5                           | 24.4                                                                 | 16                   |
| AKR1D1-P198L  | 0.4                           | ND                                                                   | 0                    |
| AKR1D1-R261C  | 0.5                           | ND                                                                   | 0                    |

\* SDS-PAGE analysis indicated only about 10% purity

ND – not detected
